# Supplementary material for: Use of 16S rRNA Gene for Identification of a Broad Range of Clinically Relevant Bacterial Pathogens
Source: PLoS One. 2015 Feb 6;10(2):e0117617. doi: 10.1371/journal.pone.0117617 (PMC4319838; doi:10.1371/journal.pone.0117617)
Supplement: S5 Dataset — (XLS) [file pone.0117617.s005.xls]

## Sheet: SuppDataset S5
Dataset S5. Characteristics of within genera percent identity distributions (Figure 2, gray violin plots)
		Genus	mean	sd	min	max	skewness	kurtosis
GRAM-POSITIVES		Enterococcus	96.79	2.45	72.69	100	-2.32	18.89
		Staphylococcus	97.44	2.34	75.57	100	-5.21	41.21
		Streptococcus	94.46	2.33	73.42	100	0.3	6.14
		Facklamia	93.84	3.25	90.7	100	0.99	2.46
		Gemella	96.95	2.21	92.64	100	-0.34	1.8
		Mycobacterium	95.55	1.81	84.07	100	-0.36	5.29
GRAM-NEGATIVES	Family Enterobacteriaceae	Citrobacter	97.51	1.73	87.26	100	-1.08	5.13
		Enterobacter	97.18	1.42	91.69	100	-0.03	2.87
		Escherichia	98.81	2	73.72	100	-9.71	113.01
		Shigella	99.15	0.55	96.68	100	-0.54	2.91
		Raoultella	98.39	1.54	90.28	100	-1.89	6.67
		Klebsiella	98.25	2.53	71.84	100	-8.32	82.92
		Proteus	98.24	1.57	90.36	100	-1.53	5.2
		Serratia	97.24	2.04	84.24	100	-1.41	9.22
		Acinetobacter	95.8	2.1	77.02	100	-1.37	10.73
		Neisseria	99.11	1.22	91.33	100	-2.44	8.69
		Pseudomonas	95.28	3.45	70.53	100	-2.7	12.96
		Stenotrophomonas	97.03	3.72	66.81	100	-4.33	25.37
		Haemophilus	96.11	2.5	83.62	100	-0.14	2.57
		Bordetella	98.69	0.81	94.94	100	-0.48	3.55
		Burkholderia	96.34	2.85	73.15	100	-2.91	19.05
